# Supplementary material
Source: PubMed Central journal article supplement (PMC8254785)
Supplement: NIHMS1701123-supplement-2.pdf [file NIHMS1701123-supplement-2.pdf]

**Supplementary Fig. S1**

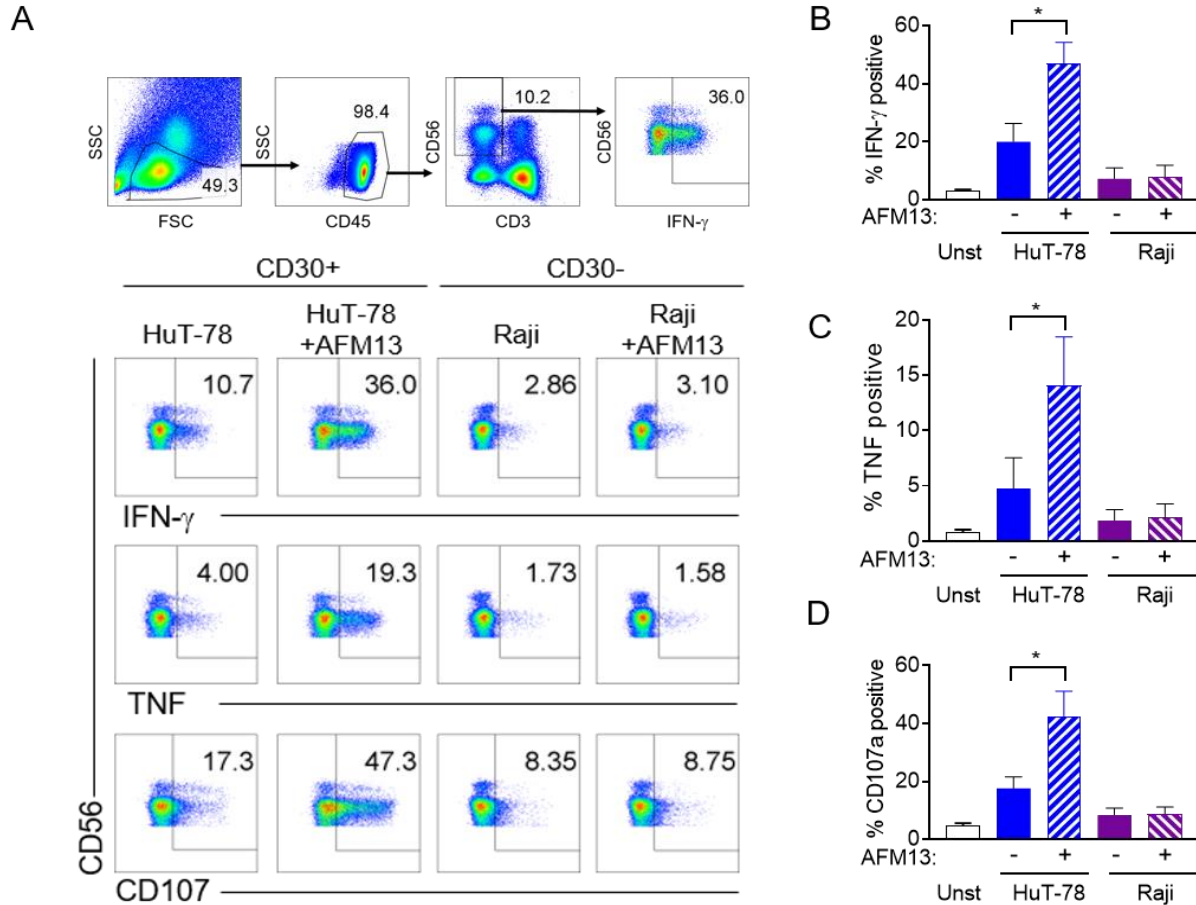

**Supplementary Fig. S1. AFM13 binding to CD30<sup>+</sup> tumors triggers cytokine secretion and degranulation of conventional human NK cells.** (A) Gating strategy and bivariate flow plots show the frequency of IFN- $\gamma$ , TNF, and CD107a positive NK cells stimulated with HuT-78 and Raji cells with or without AFM13 for 6 h. Cells were stimulated at 10:1 E:T ratio in presence of 1  $\mu$ g/ml IL-15. Summary data shows a high frequency of (B) IFN- $\gamma$ , (C) TNF, and (D) CD107a positive NK cells upon AFM13 triggering. AFM13 does not induce a significant cytokine secretion or degranulation of NK cell when lymphoma Raji cells (CD30<sup>-</sup>) were used as targets. Bars represent Mean  $\pm$  SEM. Data of 3 independent experiments. Paired t-test \* $p \leq 0.05$ , \*\* $p \leq 0.01$ . n=3-5 donors.
