# Supplementary material
Source: PubMed Central journal article supplement (PMC8254785)
Supplement: NIHMS1701123-supplement-3.pdf [file NIHMS1701123-supplement-3.pdf]

Supplementary Fig. S2

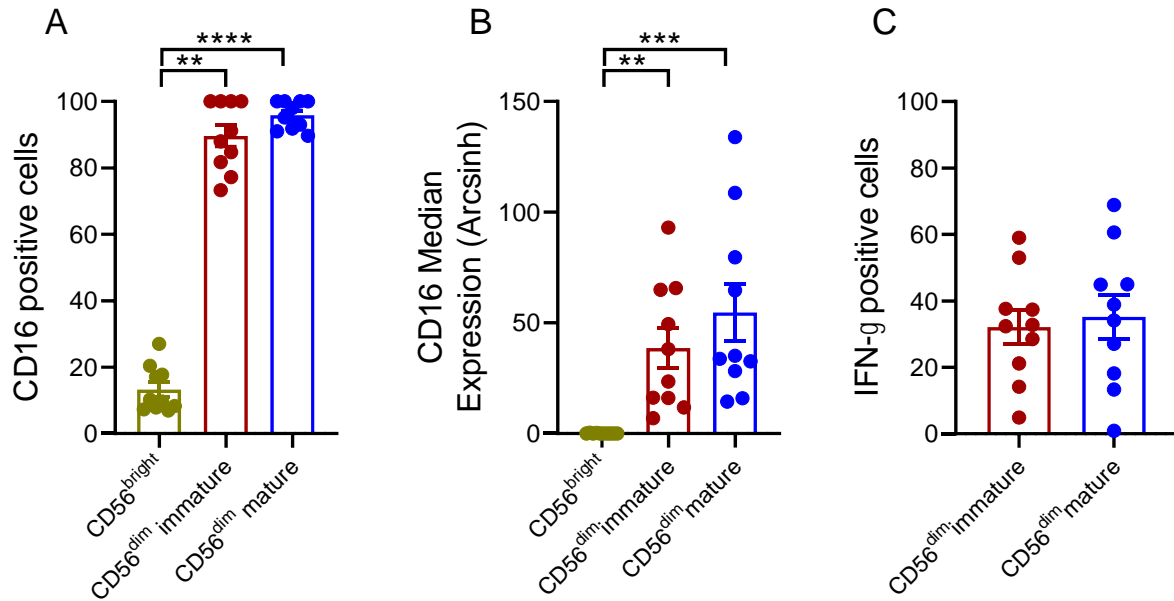

**Supplementary Fig. S2. CD16 expression and IFN- $\gamma$  production of blood mature and immature NK cells.** (A) Frequency of positive cells and (B) median expression of CD16 on unstimulated CD56<sup>bright</sup> and CD56<sup>dim</sup> immature and mature NK cells. CD56<sup>dim</sup> immature NK cells were defined as CD56<sup>bright</sup>CD16<sup>-</sup>NKG2A<sup>+</sup>CD94<sup>+</sup>KIR<sup>-</sup>CD57<sup>-</sup> and CD56<sup>dim</sup> mature NK cells as CD56<sup>dim</sup>CD16<sup>+</sup>NKG2A<sup>-</sup>CD57<sup>+</sup>. (C) Frequency of IFN- $\gamma$  positive cells in CD56<sup>bright</sup> and CD56<sup>dim</sup> immature and mature NK cells stimulated with AFM13. Bars represent mean + SEM. Kruskal Wallis test with Dunn's post hoc test. \*\*p<0.01, \*\*\*p<0.001, \*\*\*\*p<0.0001. n=10.
