# Supplementary material
Source: PubMed Central journal article supplement (PMC8254785)
Supplement: NIHMS1701123-supplement-5.pdf [file NIHMS1701123-supplement-5.pdf]

**Supplementary Fig. S4**

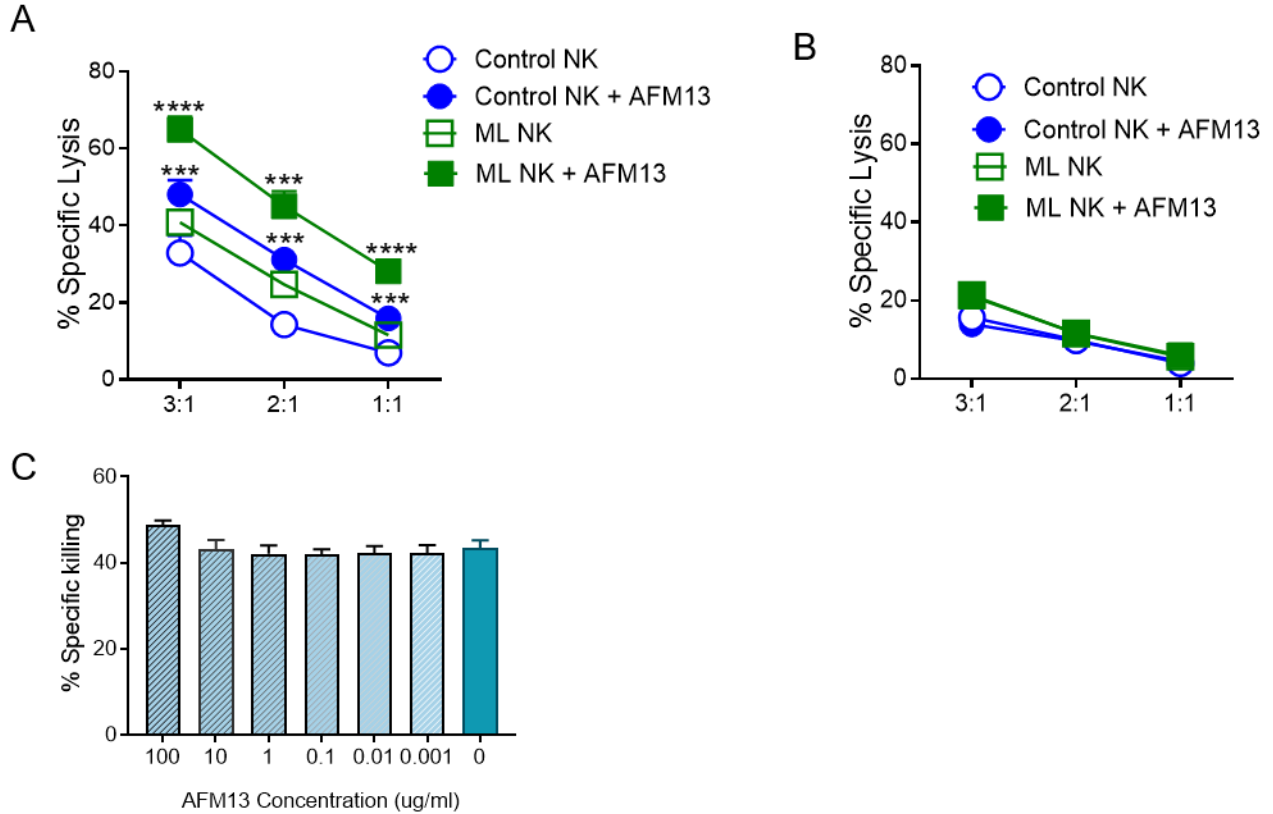

**Supplementary Fig. S4. AFM13 binding enhances cytotoxicity against CD30<sup>+</sup> but not CD30<sup>-</sup> lymphoma targets.** (A) AFM13 triggering (filled symbols) significantly increased specific killing of HuT-78 cells by control (circles) but mainly ML NK cells (squares). Statistical analysis shows differences between AFM13 treated conditions (filled symbols) vs untreated (empty symbols) Control and ML NK cells. AFM13 triggering did not enhance killing of Raji (B) or Daudi (C) CD30<sup>-</sup> lymphoma targets. In C, Bars summarize the cytotoxicity of P+E AFM13 loaded CB-NK cells (0.001-100  $\mu\text{g/ml}$ ) vs unloaded CB-NK cells (0  $\mu\text{g/ml}$ ) against Daudi targets at a 5:1 (E:T) ratio. Bars represent mean  $\pm$  SEM. Two-way ANOVA with Tukey post-test. \*\*\* $p < 0.001$ , \*\*\*\* $p < 0.0001$ . n=10 in A-B. n=3 in C.
