# Supplementary material
Source: PubMed Central journal article supplement (PMC8254785)
Supplement: NIHMS1701123-supplement-6.pdf [file NIHMS1701123-supplement-6.pdf]

Supplementary Fig. S5

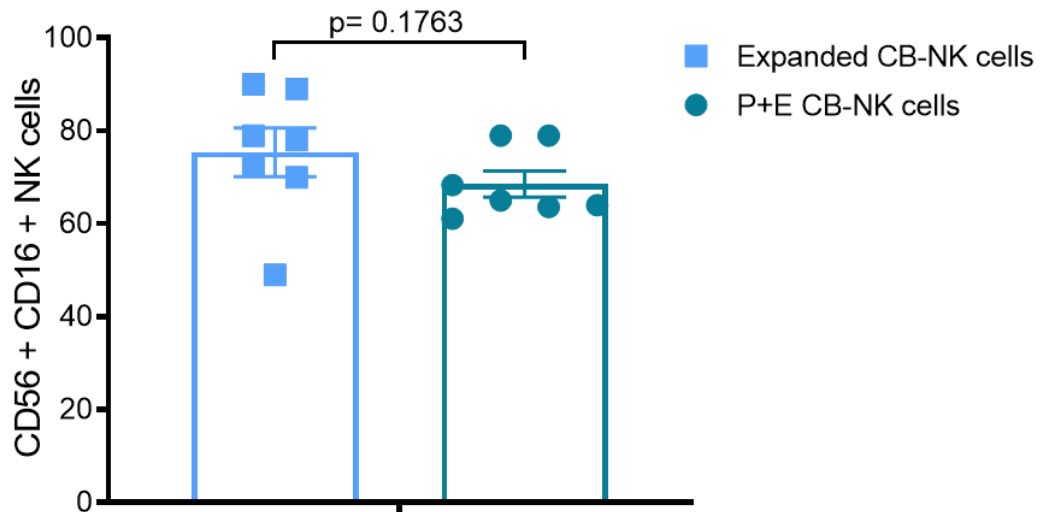

Supplementary Fig. S5. CD16 expression on pre-activated and expanded CB-NK cells.

Expression of CD16 on pre-activated and expanded (P+E) CB-NK vs. expanded on CD56<sup>+</sup>CD3<sup>-</sup> NK cells. Bars represent mean  $\pm$  SEM. Paired t-test. n=7.
