# Supplementary material
Source: PubMed Central journal article supplement (PMC8254785)
Supplement: NIHMS1701123-supplement-7.pdf [file NIHMS1701123-supplement-7.pdf]

## Supplementary Fig. S6

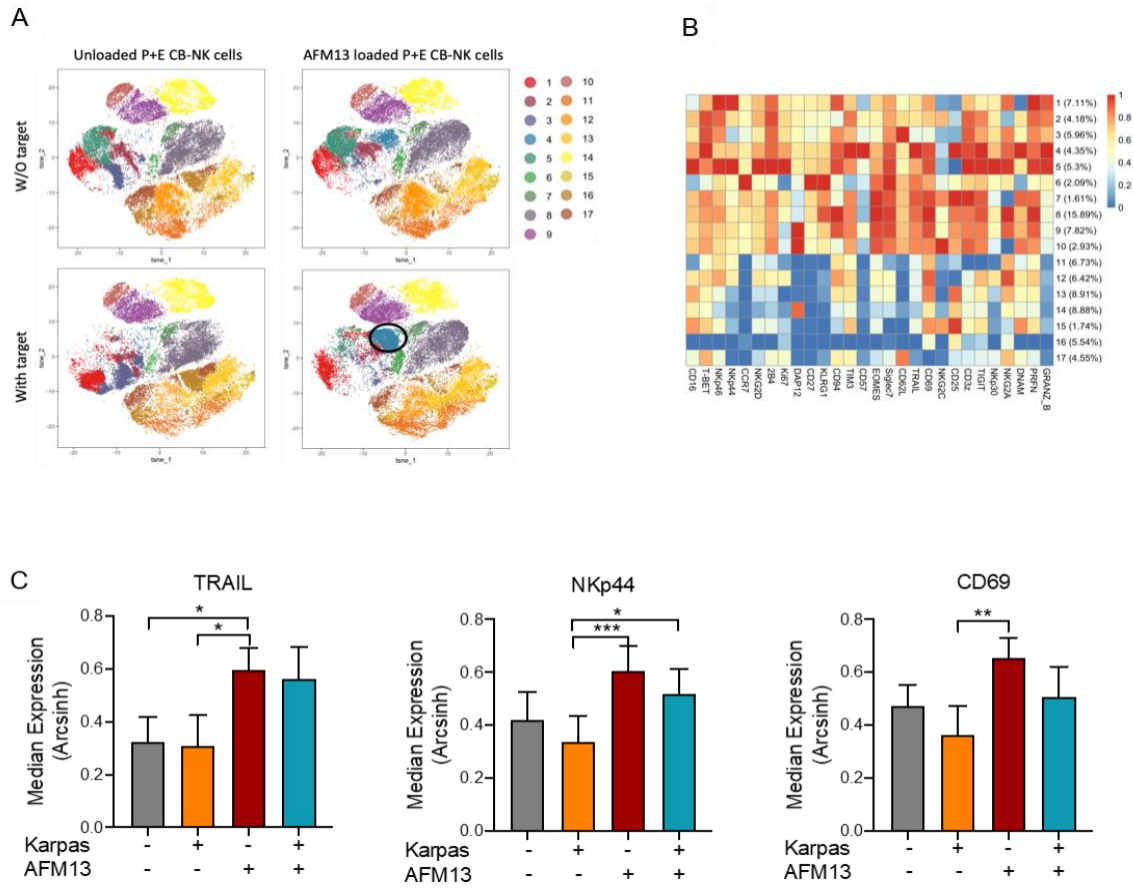

**Supplementary Fig. S6. Phenotype of preactivated and expanded CB-NK cells upon AFM13 triggering.** CB-NK cells were stimulated with Karpas cells for 4 hours with or without AFM13 (100  $\mu\text{g}/\text{ml}$ ) prior to CyTOF staining. **(A)** viSNE plots shows 17 clusters of NK cells alone (left panels), NK cells with AFM13 (right panels) without target (upper panels) or with tumor target – Karpas 299 (lower panels) derived and expanded from 7 cords. Seventeen clusters were identified by the R package Rphenograph and highlighted in different colors. **(B)** Heatmap of mass cytometry data shows the expression of individual NK cell markers, including transcription factors and cytotoxicity markers. The values represent arcsine transformed expressions which min-max normalized to [0,1] range for each marker. Each row represents a separate cluster and each column reflects the expression of a certain marker. Color scale shows the expression level for each marker, with red representing higher expression and blue lower expression in NK cells. **(C)** Summary data shows median expression of the activation and function-related markers TRAIL, NKp44, and CD69, with normalized values. Bars represent mean  $\pm$  SEM. \* $p < 0.05$ , \*\* $p < 0.005$ , \*\*\* $p < 0.0005$ , One-way ANOVA,  $n = 7$ .
