# Supplementary material
Source: PubMed Central journal article supplement (PMC8254785)
Supplement: NIHMS1701123-supplement-8.pdf [file NIHMS1701123-supplement-8.pdf]

## Supplementary Fig. S7

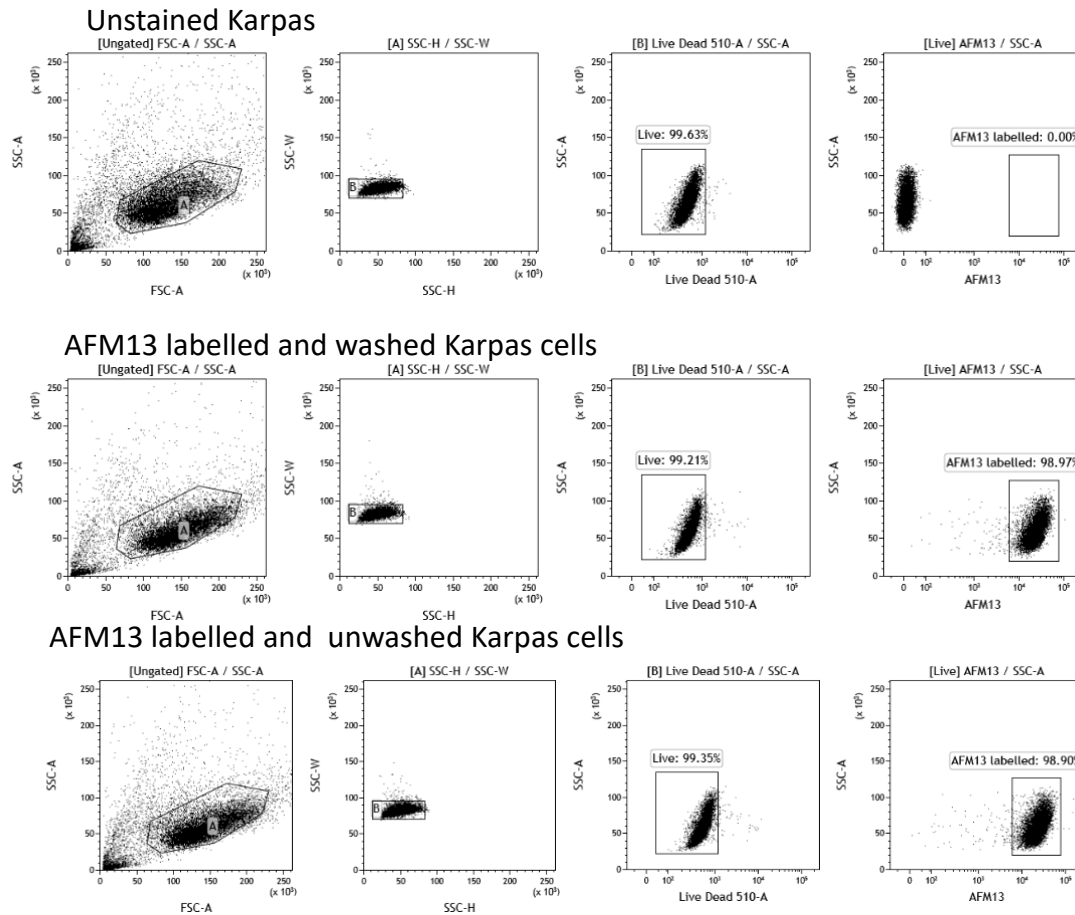

**Supplementary Fig. S7. Addition of AFM13 failed to induce apoptosis of Karpas 299 cells in the absence of NK cells.** Karpas 299 cells were labelled with 100  $\mu\text{g/ml}$  of anti-AFM13 antibody at 37 $^{\circ}\text{C}$  and were either washed after 1 hr or left unwashed. The cells were then harvested and evaluated for viability using Live/Dead staining by flow cytometer. AFM13 alone failed to induce death of Karpas 299 cells.
