# Supplementary material
Source: PubMed Central journal article supplement (PMC8254785)
Supplement: NIHMS1701123-supplement-9.pdf [file NIHMS1701123-supplement-9.pdf]

### Supplementary Fig. S8

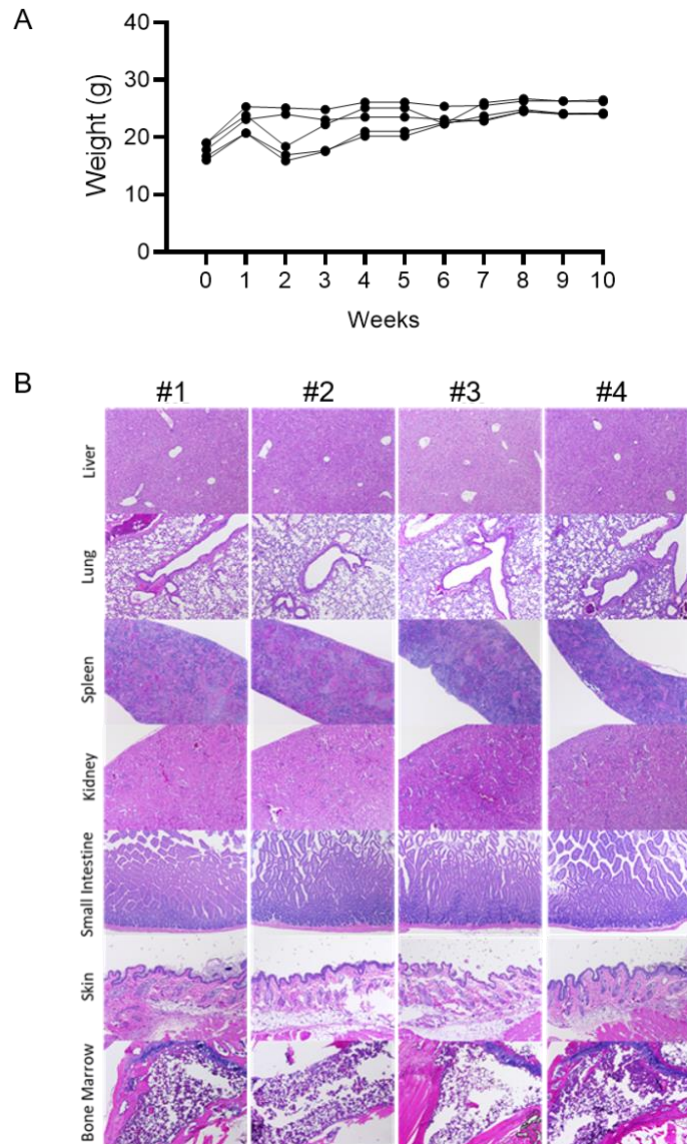

**Supplementary Fig. S8. AFM13 loaded and washed P+E CB-NK cells are safe without in vivo evidence of autonomous or dysregulated growth.** (A) NSG mice treated with  $10 \times 10^6$  AFM13-NK cell complex (P+E CB NK cells incubated with  $100 \mu\text{g/ml}$  of AFM13 for 1 hour) showed stable weight for more than 10 months of follow up. Each solid line represents one animal. (B) NSG mice  $>1$  year old after treatment with  $10 \times 10^6$  AFM13-NK cell complex were sacrificed and examined for dysregulated NK cell growth or end-organ damage. Photomicrographs of H&E staining of lung, spleen, kidney, small intestine, skin and bone marrow show no evidence of pathology. All images are at 5x magnification.
