# Supplementary material
Source: PubMed Central journal article supplement (PMC8254785)
Supplement: NIHMS1701123-supplement-10.pdf [file NIHMS1701123-supplement-10.pdf]

## Supplementary Fig. S9

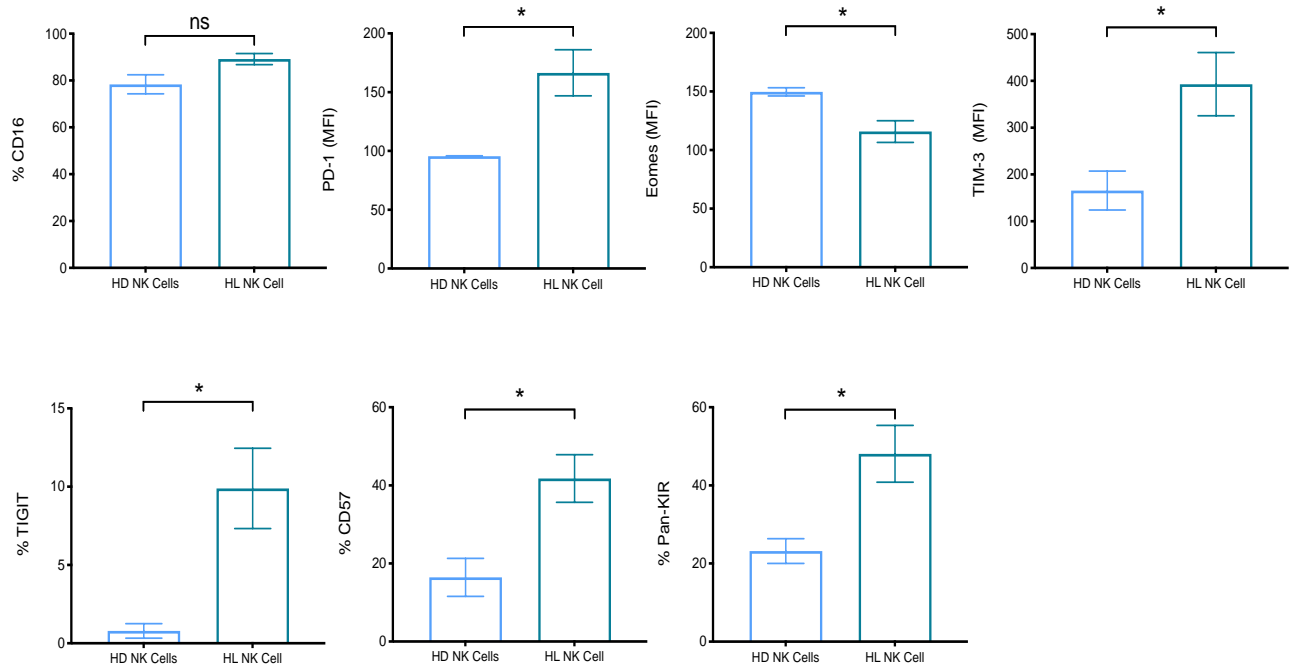

**Supplementary Fig. S9. Phenotype of NK cells from patients with Hodgkin lymphoma (HL) compared to healthy donors (HD).** NK cells from the PB of HL ( $n = 4$ ) and HD ( $n = 3$ ) were stained for expression of inhibitory markers. HL NK cells express higher levels of inhibitory receptors, but similar CD16 levels when compared to PB-NK cells. Bars represent mean  $\pm$  SEM, t-test; \*  $p < 0.05$ ; ns, not significant.
