# Supplementary material
Source: PubMed Central journal article supplement (PMC8254785)
Supplement: NIHMS1701123-supplement-11.pdf [file NIHMS1701123-supplement-11.pdf]

**Supplementary Table S1.** List of antibodies used for mass cytometry characterization of conventional NK cells.

| Tag   | Antibody                  | Clone    | Source         |
|-------|---------------------------|----------|----------------|
| 89Y   | CD45 <sup>#</sup>         | HI30     | Fluidigm       |
| 141Pr | CD14                      | M5E2     | Biologend      |
| 142Nd | CD19                      | HIB19    | Biologend      |
| 143Nd | KIR3DL1 <sup>#</sup>      | DX9      | R&D            |
| 145Nd | KR2DS4 <sup>#</sup>       | FES172   | Beckman        |
| 146Nd | KIR2DL1-2DS1 <sup>#</sup> | HP-3E4   | BD Biosciences |
| 147Sm | NKG2D <sup>#</sup>        | 1D11     | R&D            |
| 148Nd | KIR2DL2-2DL3 <sup>#</sup> | CH-L     | BD Biosciences |
| 149Sm | CD127                     | A019D5   | Fluidigm       |
| 150Nd | Mip1a                     | 93342    | R&D            |
| 151Eu | CD107a                    | H4A3     | Fluidigm       |
| 152Sm | CD8 <sup>#</sup>          | SK1      | Biologend      |
| 153Eu | CD62L                     | DREG-56  | Fluidigm       |
| 154Sm | KIR2DL5                   | UP-R1    | Milteni        |
| 155Gd | CD27 <sup>#</sup>         | L128     | Fluidigm       |
| 156Gd | PDL1-PDL2                 | 29E.2A3  | eBioscience    |
| 158Gd | CD137                     | 4B4-1    | Fluidigm       |
| 159Tb | NKG2C <sup>#</sup>        | 134591   | R&D            |
| 160Gd | CD69                      | FN50     | Biologend      |
| 161Dy | NKp30 <sup>#</sup>        | P30-15   | Biologend      |
| 162Dy | LAG3                      | 11C3C65  | Biologend      |
| 163Dy | CD94 <sup>#</sup>         | DX22     | Biologend      |
| 164Dy | Tim-3                     | F38-2E2  | Biologend      |
| 165Ho | CD16                      | 3G8      | Fluidigm       |
| 166Er | NKG2A <sup>#</sup>        | Z199     | Fisher         |
| 167Er | NKp44 <sup>#</sup>        | P44-8    | Biologend      |
| 168Er | IFN-g                     | B27      | Fluidigm       |
| 169Tm | CD25                      | 2A3      | Fluidigm       |
| 170Er | NKp80 <sup>#</sup>        | 239127   | R&D            |
| 171Yb | PD-1                      | ebioJ105 | eBioscience    |
| 172Yb | CD57 <sup>#</sup>         | HCD57    | Fluidigm       |
| 173Yb | CD3                       | UCHT1    | BD Biosciences |
| 174Yb | NKp46                     | 9E2      | BD Biosciences |
| 175Lu | TNF                       | Mab11    | Fluidigm       |
| 176Yb | CD56 <sup>#</sup>         | NCAM16.2 | Fluidigm       |
| 195Pt | Cisplatin                 |          |                |
| 209Bi | CD11b <sup>#</sup>        | ICR44    | Fluidigm       |

#Clustering channels used to run viSNE and perform SPADE analysis.
