# Supplementary material
Source: PubMed Central journal article supplement (PMC8254785)
Supplement: NIHMS1701123-supplement-12.pdf [file NIHMS1701123-supplement-12.pdf]

**Supplementary Table S2.** List of antibodies used for mass cytometry characterization of CB-NK cells

| <b>Tag</b> | <b>Antibody</b> | <b>Clone</b> | <b>Source</b> |
|------------|-----------------|--------------|---------------|
| 141Pr      | KIR2DL1/S5      | HP-MA4       | Biologend     |
| 143Nd      | KIR2DL2/L3      | DX27         | Biologend     |
| 146Nd      | DAP12           | 406288       | R&D           |
| 154Sm      | TIGIT           | MBSA43       | Thermo Fisher |
| 160Gd      | KIR3DL2         | 539304       | R&D           |
| 161Dy      | T-bet           | 4B10         | Biologend     |
| 162Dy      | NKp46           | BAB281       | Fluidigm      |
| 163Dy      | NKp44           | P44-8        | Biologend     |
| 166Er      | NKG2D           | 1D11         | R&D           |
| 168Er      | Ki67            | Ki-67        | Biologend     |
| 171Yb      | DNAM            | DX11         | BD Bioscience |
| 173Yb      | Granzyme B      | GB11         | BD Bioscience |
| 142Nd      | EOMES           | WD1928       | Thermo Fisher |
| 145Nd      | CD62L           | DREG-56      | Biologend     |
| 149Sm      | CD25            | 2A3          | Miltenyi      |
| 150Nd      | CD69            | FN50         | Biologend     |
| 155Gd      | CD27            | L128         | BD Bioscience |
| 156Gd      | KLRG1           | 13F12F2      | Thermo Fisher |
| 158Gd      | CD94            | DX22         | Biologend     |
| 159Tb      | NKp30           | Z5           | Fluidigm      |
| 164Dy      | CCR7            | G043H7       | Biologend     |
| 167Er      | 2B4             | C1.7         | Thermo Fisher |
| 169Tm      | NKG2A           | Z199         | Fluidigm      |
| 172Yb      | Perforin        | dG9          | Biologend     |
| 174Yb      | Granzyme A      | CB9          | Biologend     |
| 209Bi      | CD16            | 3G8          | Fluidigm      |
| 194Pt      | CD3             | UCHT-1       | Biologend     |
| 165Ho      | TIM3            | 344823       | R&D           |
| 148Nd      | Trail           | RIK-2        | BD Bioscience |
| 147Sm      | NKG2C           | 134591       | R&D           |
| 175Lu      | KIR3DL1         | DX9          | BD Bioscience |
| 176Yb      | CD56            | NCAM16.2     | BD Bioscience |
| 89Y        | CD45            | HI30         | BD Bioscience |
| 115In      | CD57            | HCD57        | Biologend     |
| 152Sm      | CD3z            | 6B10.2       | Biologend     |
| 198Pt      | Cisplatin       |              | Fluidigm      |
